# Supplementary material
Source: HighWire-hosted journal article supplement (https://cmaj.ca/highwire/filestream/57754/field_highwire_adjunct_files/0/52.pdf)
Supplement: 52.pdf [file 52.pdf]

QUATRE CHOSES À SAVOIR SUR...

## La dégénérescence maculaire liée à l'âge

Jason Noble MD, Varun Chaudhary MD

Publié précédemment dans [www.cmaj.ca](http://www.cmaj.ca)

**Au Canada, la dégénérescence maculaire liée à l'âge est l'une des principales causes de perte de vision sévère et irréversible.**

Parmi les principaux facteurs de risque, citons le vieillissement, le tabagisme, les antécédents familiaux et la race (blanche)<sup>1</sup>. Certains polymorphismes spécifiques du gène codant pour le facteur H (CFH) sont fortement associés à la maladie<sup>2</sup>. En revanche, les résultats de vastes études épidémiologiques ne permettent pas d'établir que l'exposition au soleil, l'hypertension, la consommation d'alcool et l'hypercholestérolémie en représentent des facteurs de risque constants.

**Dans sa forme sèche, la dégénérescence maculaire liée à l'âge est asymptomatique. L'évolution de la forme humide de la maladie se caractérise toutefois par la perte soudaine et sévère de la vision ou l'apparition de distorsions visuelles (métamorphopsies).**

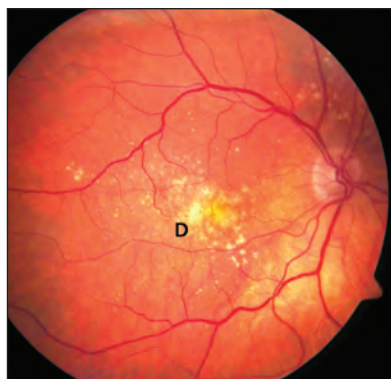

**Figure 1 :** Fond de l'œil droit d'un patient atteint de la forme sèche de dégénérescence maculaire liée à l'âge, où l'on observe deux drusens, grand et moyen (D).

Pour sa part, la forme sèche se caractérise par la présence sur la rétine de drusens maculaires et d'altérations de l'épithélium pigmentaire. Les cas intermédiaires et sévères de la forme sèche se distinguent par de grands drusens et l'atrophie géographique qui peuvent causer une perte d'acuité visuelle sévère surtout si la fovéa est atteinte (figure 1). La forme humide se manifeste par des hémorragies maculaires et l'exsudation des néo-vaisseaux choroïdiens, détectées lors d'examen cliniques (annexe 1, accessible au [www.cmaj.ca/cgi/content/full/cmaj.090378/DC1](http://www.cmaj.ca/cgi/content/full/cmaj.090378/DC1)). Elle représente quelque 80 % des cas de perte de vision attribuables à la dégénérescence maculaire liée à l'âge<sup>3</sup>.

**Les patients doivent se soumettre régulièrement à une ophtalmoscopie après dilatation pupillaire pour détecter l'évolution subclinique de la maladie<sup>4</sup>**

Les patients doivent se faire examiner régulièrement pour déterminer s'ils peuvent bénéficier de certaines interventions. Ceux âgés de plus de 55 ans qui ne présentent aucun facteur de risque devraient passer un examen chaque année ou tous les deux ans<sup>4</sup>. Quant aux patients se trouvant à un stade précoce de la maladie ou présentant des antécédents familiaux, ils devraient se soumettre à un suivi plus rigoureux. On devrait recommander aux patients se trouvant à un stade intermédiaire ou avancé de la forme sèche de la maladie de prendre une combinaison de multivitamines, comme le démontre une étude sur les maladies de l'œil liées à l'âge. Ces suppléments vitaminiques réduisent en effet de 25 % le risque de progression vers la forme humide de la maladie<sup>5</sup>. Toutefois, cet apport supplémentaire n'aura pas forcément des effets bénéfiques chez les patients à un stade précoce de la maladie. L'abandon du tabagisme contribue nettement à réduire le risque de progression de la maladie à un stade avancé<sup>6</sup>.

**Intérêts conflictuels :** Aucun déclaré.

Cet article a fait l'objet d'une évaluation par des pairs.

Département d'ophtalmologie et des sciences de la vue (Noble), Université de Toronto, Toronto (Ontario), et Département d'ophtalmologie (Chaudhary), Université McMaster, Hamilton (Ontario).

Consulter les références à l'annexe 2 (accessible au [www.cmaj.ca/cgi/content/full/cmaj.090378/DC1](http://www.cmaj.ca/cgi/content/full/cmaj.090378/DC1)).

**Les patients qui constatent un changement soudain de leur acuité visuelle doivent passer un examen ophtalmologique de toute urgence.**

L'autoévaluation fondée sur la grille d'Amsler (accessible à [www.macular.org/chart.html](http://www.macular.org/chart.html)) joue un rôle prépondérant dans la détection de la maladie à un stade précoce. Toute apparition de distorsions visuelles, tout changement de vision constaté à l'aide de la grille d'Amsler ou tout autre changement soudain de la vision peut être un signe du développement de la forme humide de dégénérescence maculaire liée à l'âge. Dans certains cas, un traitement en temps opportun peut réduire le risque de perte permanente de l'acuité visuelle.
